# Supplementary material for: Sulforaphane Inhibits IL-1β-Induced IL-6 by Suppressing ROS Production, AP-1, and STAT3 in Colorectal Cancer HT-29 Cells
Source: MDPI journal article supplement (doi:10.3390/antiox13040406), 2024-03-28
Supplement: s1 [file s1]

## Supplementary Data

**Sulforaphane inhibits IL-1 $\beta$ -induced IL-6 by suppressing ROS production, AP-1, and STAT3 in colorectal cancer HT-29 cells**

**Dhiraj Kumar Sah<sup>1</sup>, Archana Arjunan<sup>1</sup>, Sun Young Park<sup>2</sup>, Bora Lee<sup>1\*</sup>, Young Do Jung<sup>1\*</sup>**

<sup>1</sup> Department of Biochemistry, Chonnam National University Medical School, Hwasun 58128, South Korea

<sup>2</sup> Department of Internal Medicine, Chonnam National University Medical School, Gwangju 501190, South Korea

\*Corresponding authors: Bora Lee, MD, PhD; Young Do Jung, MD, PhD

Department of Biochemistry, Chonnam National University Medical School, Seoyang Ro 264, Hwasun, Jeonnam 58138, Korea

Fax: 82-81-379-2781; E-mail: [blee03@jnu.ac.kr](mailto:blee03@jnu.ac.kr) (BL), [ydjung@chonnam.ac.kr](mailto:ydjung@chonnam.ac.kr) (YDJ)

**Supplementary Table S1. The list of primers used in this study**

| Gene           | Forward primer                   | Reverse primer                   | Accession number |
|----------------|----------------------------------|----------------------------------|------------------|
| $\beta$ -actin | 5'-AAG CAG GAG TAT GAC GAG TC-3' | 5'-GCC TTC ATA CAT CTC AAG TT-3' | NM_001101.5      |
| IL-6           | 5'-ACA CAG ACA GCC ACT CAC C-3'  | 5'-TACATTTGCCGAAGAGCC-3'         | NM_001371096.1   |
| GAPDH          | 5'-TGG TAT CGT GGA AGG ACT CA-3' | 5'-GGA TGA TGT TCT GGA GAG CC-3' | NM_001289745.3   |
